# Supplementary material for: A semi-covalent molecularly imprinted fluorescent sensor for highly specific recognition and optosensing of bisphenol A
Source: Royal Society of Chemistry journal article supplement (doi:10.1039/d0ay01822h), 2020-11-23
Supplement: d0ay01822h1.pdf [file d0ay01822h1.pdf]

# A semi-covalent molecularly imprinted fluorescent sensor for highly specific recognition and optosensing of bisphenol A

Jinna Zhang, Haiyang Wang, Longhua Xu\*, Zhixiang Xu\*

*Key Laboratory of Food Processing Technology and Quality Control in Shandong Province,  
College of Food Science and Engineering, Shandong Agricultural University, Tai'an, Shandong  
271018, P.R. China*

\*Corresponding author:

E-mail: xulonghua6@163.com, zhixiangxu@sina.com

Tel: +86 538 8242263

Fax: +86 538 8242482\*

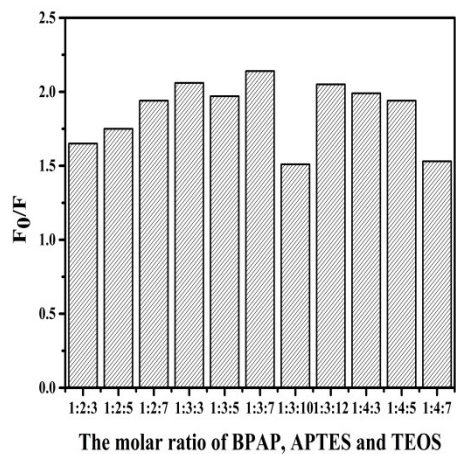

**Fig.S1** Effects of molar ratio of template molecule, functional monomers and cross-linker on imprinting effect of CDs@MIP.

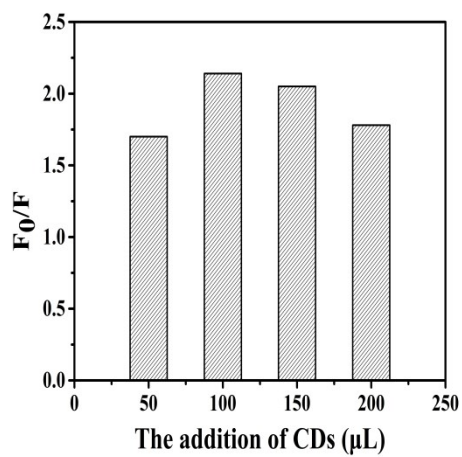

**Fig. S2** Effects of additional volume of CDs on imprinting of CDs@MIP.

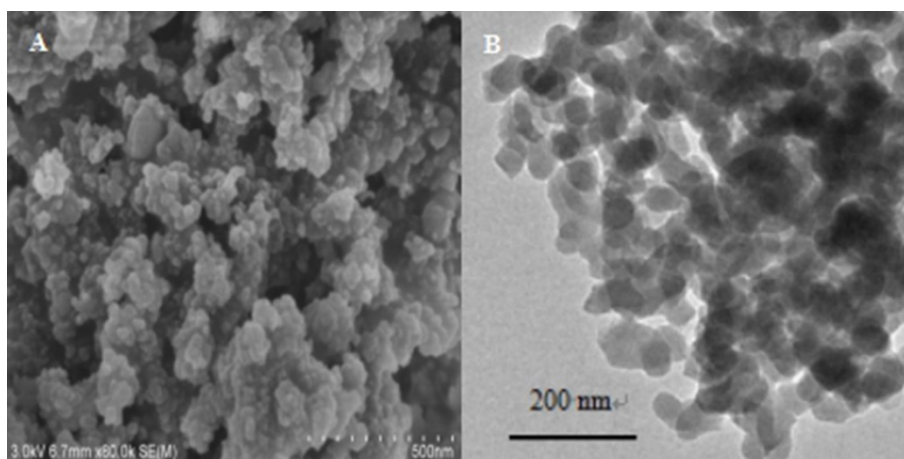

**Fig.S3** Scanning electron microscopy (A) and transmission electron microscopy (B) images of

CDs@MIP.

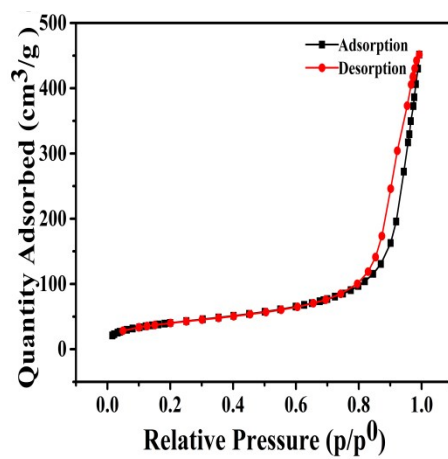

**Fig. S4** N<sub>2</sub> adsorption-desorption curves for CDs@MIP

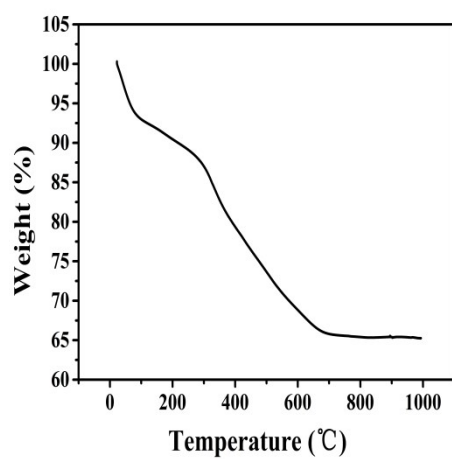

**Fig. S5** Thermo-gravimetric analysis curve of CDs@MIP in N<sub>2</sub>.

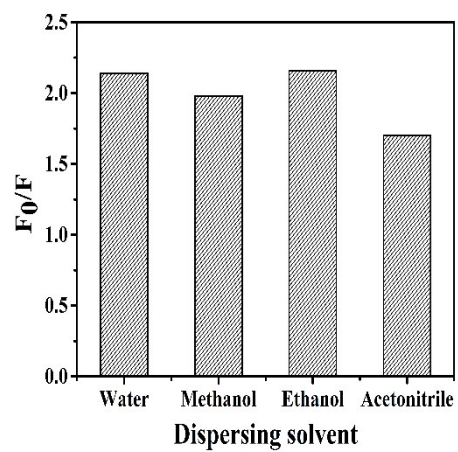

**Fig. S6** Effects of dispersing solvent on CDs@MIP imprinting.

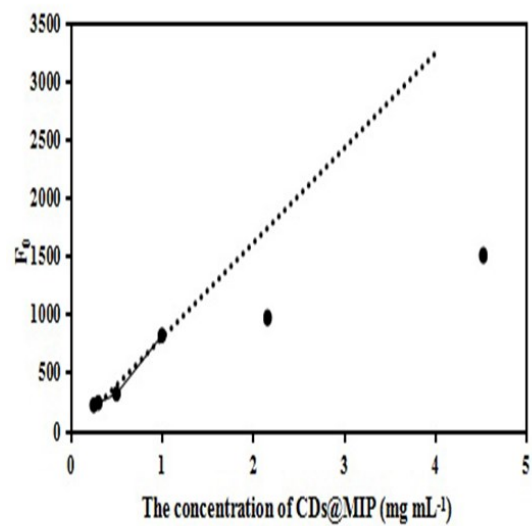

**Fig. S7** Effects of CDs@MIP concentration on fluorescence intensity.



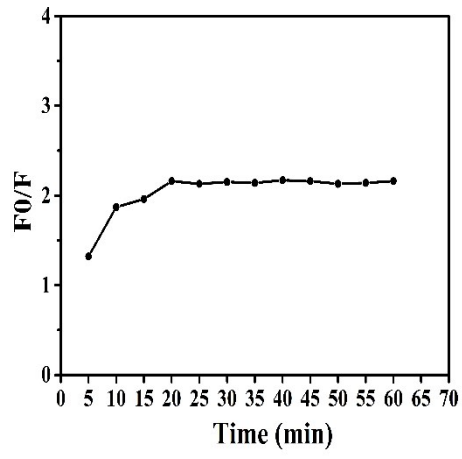

**Fig. S8** Kinetic uptake of BPA molecules on to CDs@MIP

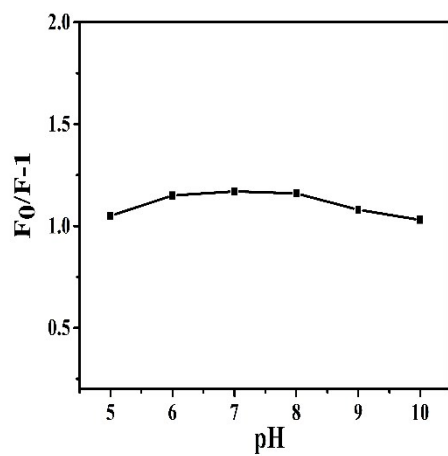

**Fig. S9** Effect of pH on the fluorescence change of CDs@MIP sensor

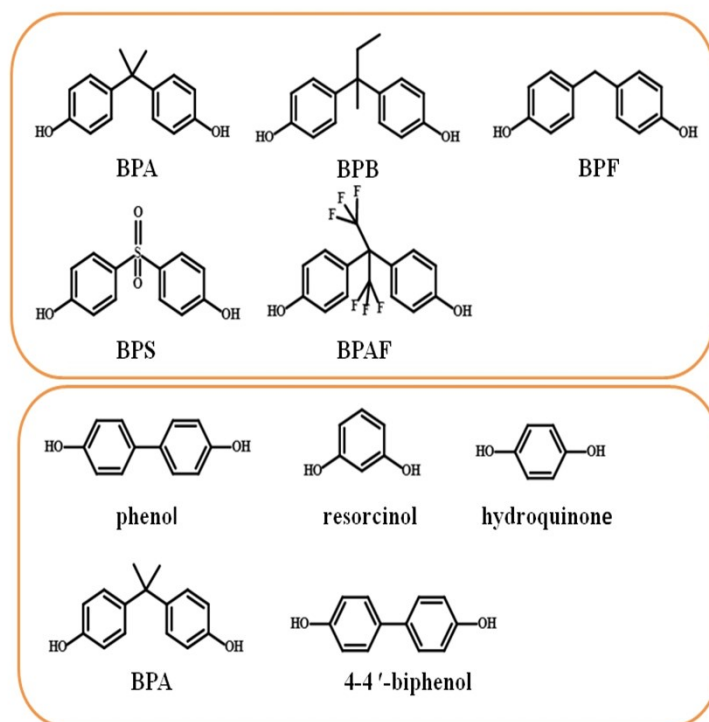

**Fig. S10** Structures of BPA analogues.

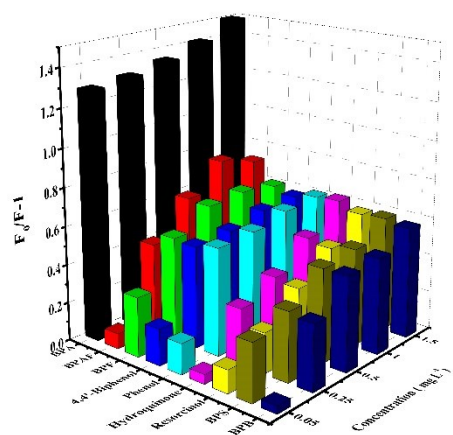

**Fig. S11** Selective adsorption of CDs@MIP to different concentration of BPA, BPB, BPS, BPF,

BPAF, phenol, hydroquinone, 4,4'-biphenol and resorcinol.

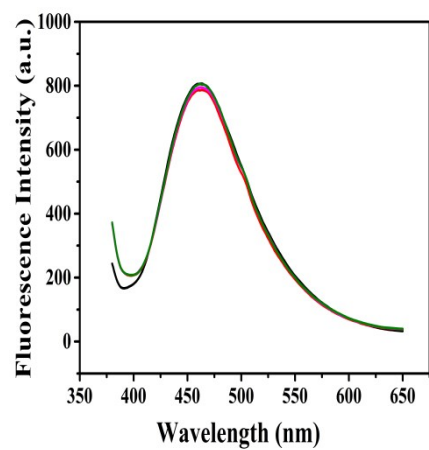

**Fig. S12** Fluorescence spectra of CDs @ MIP from four different batches.

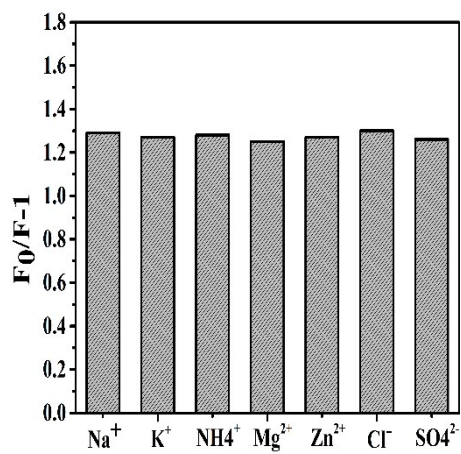

**Fig. S13** Influence of potentially interfering ions on fluorescence response of CDs@MIP

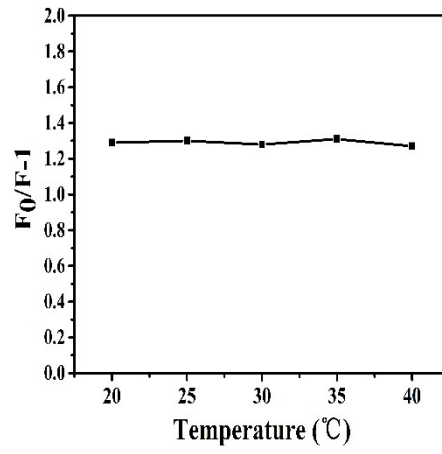

**Fig. S14** Effect of temperature on the fluorescence change of CDs@MIP sensor

**Table S1** Comparison of different methods for BPA detection

| Categorys          | CDs@MIP sensor             | Reported methods               | References |
|--------------------|----------------------------|--------------------------------|------------|
| pH                 | 5-10                       | 4                              | 43         |
| Linear range       | 0.025-2 mg L <sup>-1</sup> | 0.0228-0.57 mg L <sup>-1</sup> | 42         |
| Response time      | 20 min                     | 40 min                         | 41         |
| Limit of detection | 0.016 mg L <sup>-1</sup>   | 0.0228 mg L <sup>-1</sup>      | 40         |
